# Supplementary material
Source: bioRxiv or medRxiv preprint supplement (https://www.medrxiv.org/highwire/filestream/77604/field_highwire_adjunct_files/1/2020.04.19.20065219-2.pdf)
Supplement: Supplementary file [file 2020.04.19.20065219-2.pdf]

## **Appendix**

**Paper title:** The association between age, COVID-19 symptoms, and social distancing behavior in the United States

This appendix contains the same tables and figures as in the main paper except that in these versions all results are computed without weights.

**S1 Table. Multivariate analysis results of going out and number of people in close contact yesterday (Unweighted)**

| VARIABLES                                          | Going out yesterday         |                             | Number of people in close contact |                             |
|----------------------------------------------------|-----------------------------|-----------------------------|-----------------------------------|-----------------------------|
|                                                    | Model 1                     | Model 2                     | Model 3                           | Model 4                     |
| Any COVID-19 symptom (ref=no)                      | 0.989<br>(0.846 - 1.157)    |                             | 1.200**<br>(1.003 - 1.436)        |                             |
| Fever (ref=no)                                     |                             | 1.038<br>(0.738 - 1.462)    |                                   | 1.004<br>(0.667 - 1.510)    |
| Dry cough (ref=no)                                 |                             | 0.906<br>(0.758 - 1.084)    |                                   | 1.351***<br>(1.108 - 1.647) |
| Shortness of breath (ref=no)                       |                             | 1.008<br>(0.792 - 1.285)    |                                   | 0.786*<br>(0.598 - 1.031)   |
| Other flu-like symptoms (ref=no)                   | 0.591***<br>(0.458 - 0.764) | 0.600***<br>(0.457 - 0.788) | 0.635***<br>(0.478 - 0.844)       | 0.674**<br>(0.492 - 0.924)  |
| Male (ref=female)                                  | 1.290***<br>(1.108 - 1.503) | 1.288***<br>(1.106 - 1.500) | 1.067<br>(0.900 - 1.266)          | 1.066<br>(0.899 - 1.264)    |
| Age groups (ref=18-29)                             |                             |                             |                                   |                             |
| 30-39                                              | 0.705***<br>(0.573 - 0.867) | 0.704***<br>(0.572 - 0.866) | 0.690***<br>(0.553 - 0.861)       | 0.694***<br>(0.557 - 0.865) |
| 40-49                                              | 0.891<br>(0.716 - 1.109)    | 0.891<br>(0.716 - 1.109)    | 0.621***<br>(0.492 - 0.784)       | 0.624***<br>(0.494 - 0.788) |
| 50-59                                              | 0.910<br>(0.720 - 1.150)    | 0.909<br>(0.720 - 1.148)    | 0.593***<br>(0.468 - 0.753)       | 0.595***<br>(0.470 - 0.755) |
| 60-69                                              | 0.965<br>(0.734 - 1.267)    | 0.962<br>(0.732 - 1.264)    | 0.463***<br>(0.336 - 0.639)       | 0.464***<br>(0.337 - 0.639) |
| ≥70                                                | 0.734*<br>(0.527 - 1.023)   | 0.732*<br>(0.525 - 1.019)   | 0.668*<br>(0.431 - 1.033)         | 0.669*<br>(0.432 - 1.035)   |
| High school or less (ref=some college or more)     | 0.695<br>(0.445 - 1.085)    | 0.696<br>(0.445 - 1.088)    | 1.255<br>(0.769 - 2.047)          | 1.272<br>(0.782 - 2.068)    |
| Individual income in 2019 (ref=Less than \$20,000) |                             |                             |                                   |                             |
| \$20,000 to less than \$50,000                     | 1.026<br>(0.809 - 1.301)    | 1.029<br>(0.812 - 1.306)    | 0.876<br>(0.661 - 1.161)          | 0.872<br>(0.659 - 1.154)    |
| \$50,000 to less than \$100,000                    | 1.348**<br>(1.072 - 1.693)  | 1.349**<br>(1.074 - 1.696)  | 1.020<br>(0.780 - 1.335)          | 1.013<br>(0.775 - 1.324)    |

|                                                            |                             |                             |                             |                             |
|------------------------------------------------------------|-----------------------------|-----------------------------|-----------------------------|-----------------------------|
| \$100,000 or more                                          | 1.315**<br>(1.044 - 1.657)  | 1.316**<br>(1.045 - 1.658)  | 0.819<br>(0.612 - 1.098)    | 0.814<br>(0.608 - 1.089)    |
| Have paid work in February 2020<br>(ref=no)                | 1.356***<br>(1.131 - 1.625) | 1.353***<br>(1.129 - 1.622) | 1.914***<br>(1.505 - 2.435) | 1.927***<br>(1.514 - 2.451) |
| Household size (including the<br>respondent)               | 0.949*<br>(0.898 - 1.003)   | 0.948*<br>(0.897 - 1.002)   | 0.952<br>(0.892 - 1.016)    | 0.949<br>(0.889 - 1.012)    |
| Natural logarithm of population<br>density per square mile | 1.111***<br>(1.062 - 1.161) | 1.110***<br>(1.062 - 1.160) | 0.979<br>(0.928 - 1.033)    | 0.979<br>(0.928 - 1.033)    |
| Day of survey completion (ref=<br>Saturday April 4, 2020)  |                             |                             |                             |                             |
| Sunday April 5, 2020                                       | 1.862***<br>(1.245 - 2.786) | 1.861***<br>(1.244 - 2.783) | 1.006<br>(0.624 - 1.623)    | 1.012<br>(0.627 - 1.633)    |
| Monday April 6, 2020                                       | 1.801***<br>(1.199 - 2.704) | 1.800***<br>(1.199 - 2.702) | 0.834<br>(0.514 - 1.354)    | 0.835<br>(0.514 - 1.356)    |
| Tuesday April 7, 2020                                      | 1.496*<br>(0.965 - 2.319)   | 1.494*<br>(0.964 - 2.315)   | 1.122<br>(0.662 - 1.900)    | 1.123<br>(0.662 - 1.902)    |
| Observations                                               | 4,669                       | 4,669                       | 4,676                       | 4,676                       |

\*\*\*  $p < 0.01$ , \*\*  $p < 0.05$ , \*  $p < 0.1$

Notes: Logistic regressions were used to estimate risks of going out yesterday. Poisson regressions were used to predict number of close contacts yesterday. Coefficients are reported as odds ratios in the logistic regression models 1 and 2 and incidence rate ratios in the Poisson regression models 3 and 4. Estimates are presented with the 95% confidence intervals in parentheses below. Heteroskedastic robust standard errors were used to calculate the 95 percent confidence intervals. 'ref' indicates the reference group in the regression. Any COVID-19 symptom includes fever, dry cough, or shortness of breath; all symptoms measured over the last two weeks. Yesterday refers to the day before taking the survey; Those going out for health care only were not counted as going out; Household members were excluded from the close contact count; Close contact means in-person contact within six feet. In addition to covariates listed above, fixed effects for each of the 50 states, District of Columbia, and Puerto Rico, were used.

**S1 Fig. Prevalence of COVID-19 symptoms in last two weeks.**

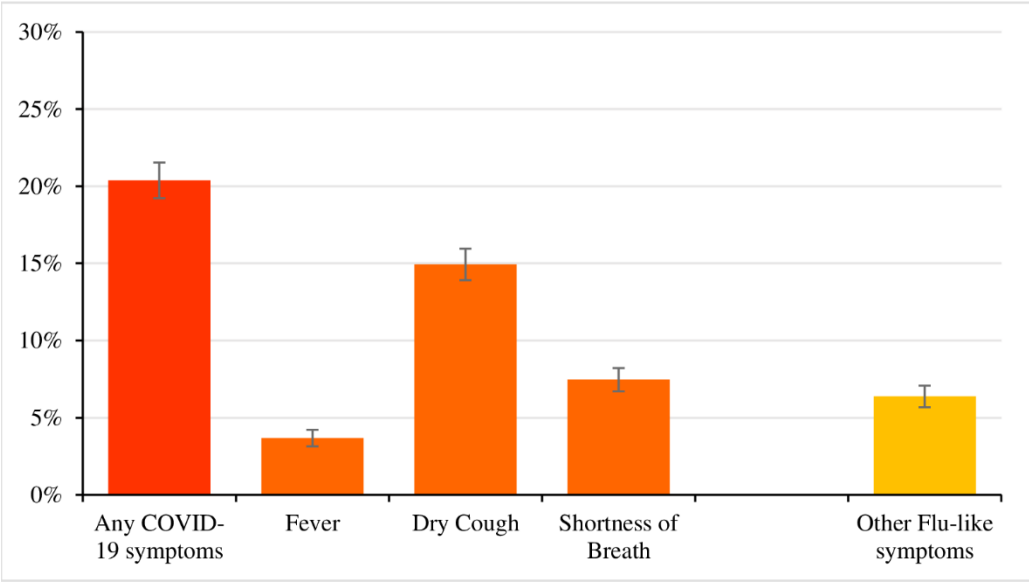

Note: (A) Any COVID-19 symptoms include fever, dry cough, or shortness of breath; (B) Error bars represent 95 percent confidence intervals of symptom prevalence rate.

**S2 Fig. Predicted probabilities of going out yesterday by COVID-19 symptoms.**

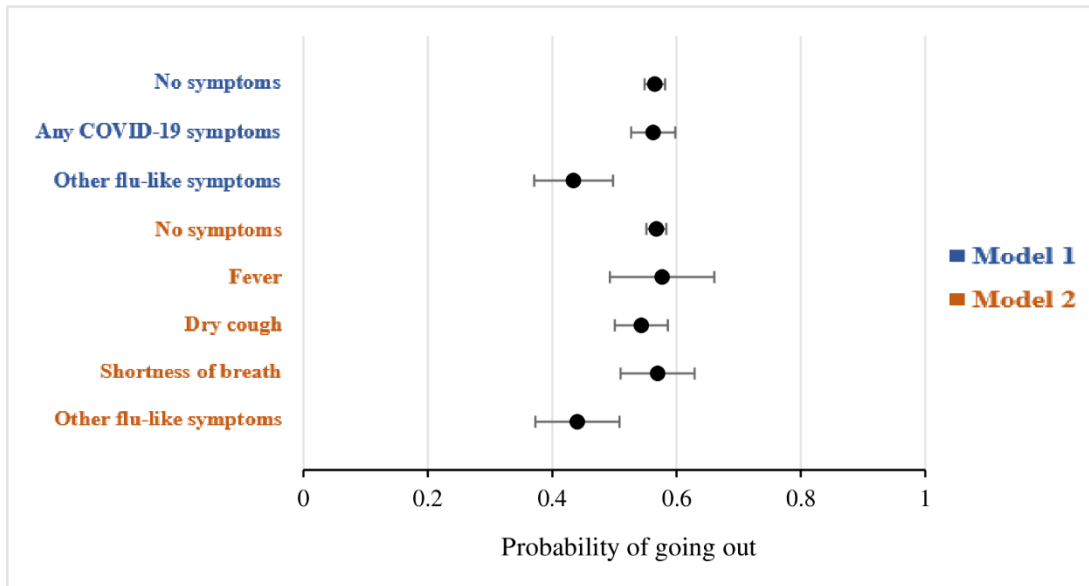

Notes: (A) Yesterday refers to the day before taking the survey; (B) No symptoms refer to neither COVID-19 symptoms nor other flu-like symptoms; (C) Predicted probabilities and 95 percent confidence intervals were calculated at mean values of other covariates from Model 1 and Model 2 in S1 Table.

**S3 Fig. Predicted probabilities of going out yesterday by age groups.**

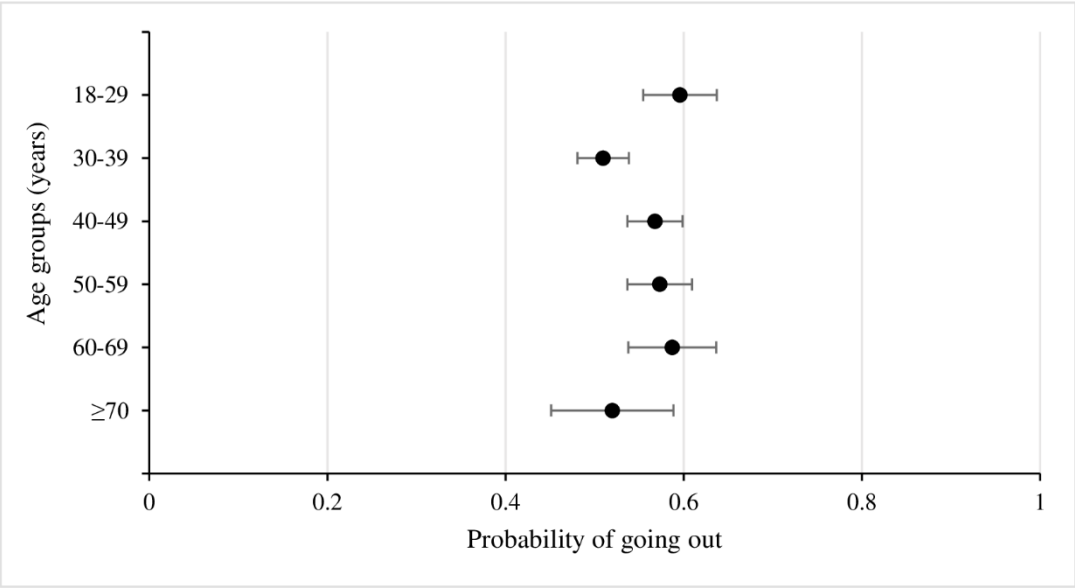

Notes: (A) Yesterday refers to the day before having the survey; (B) Predicted probabilities and 95 percent confidence intervals were calculated at mean values of other covariates from Model 1 of S1 Table.

**S4 Fig. Predicted number of close contacts yesterday by COVID-19 symptoms.**

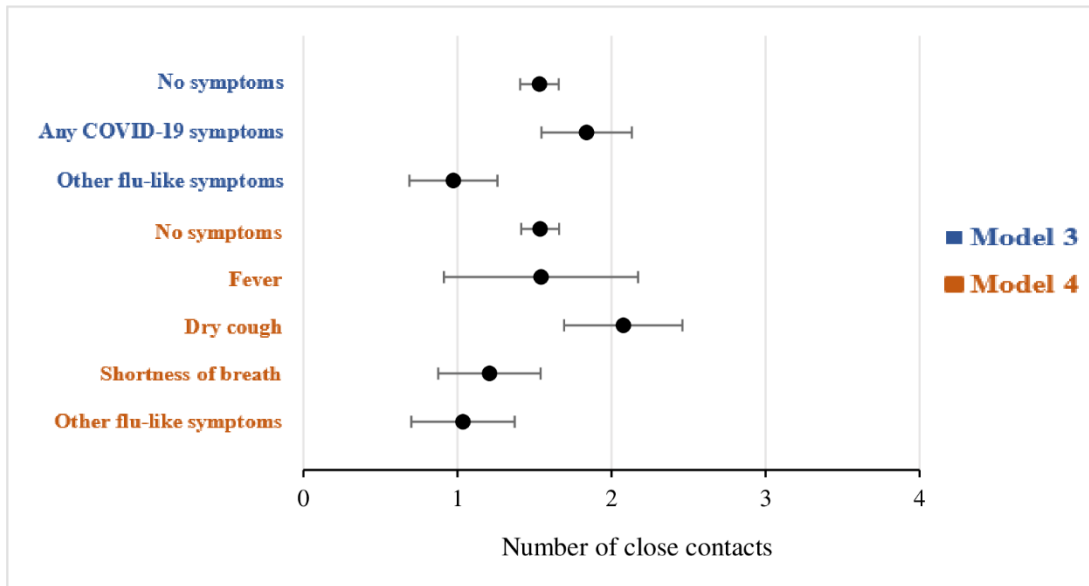

Note: (A) Close contact means coming within six feet of a non-household member; (B) Yesterday refers to the day before taking the survey; (C) No symptoms refers to neither COVID-19 symptoms nor other flu-like symptoms. (D) Predicted number of contacts and 95 percent confidence intervals were calculated at mean values of other covariates based on Model 3 and Model 4 of S1 Table.

**S5 Fig. Predicted number of close contacts yesterday by age groups.**

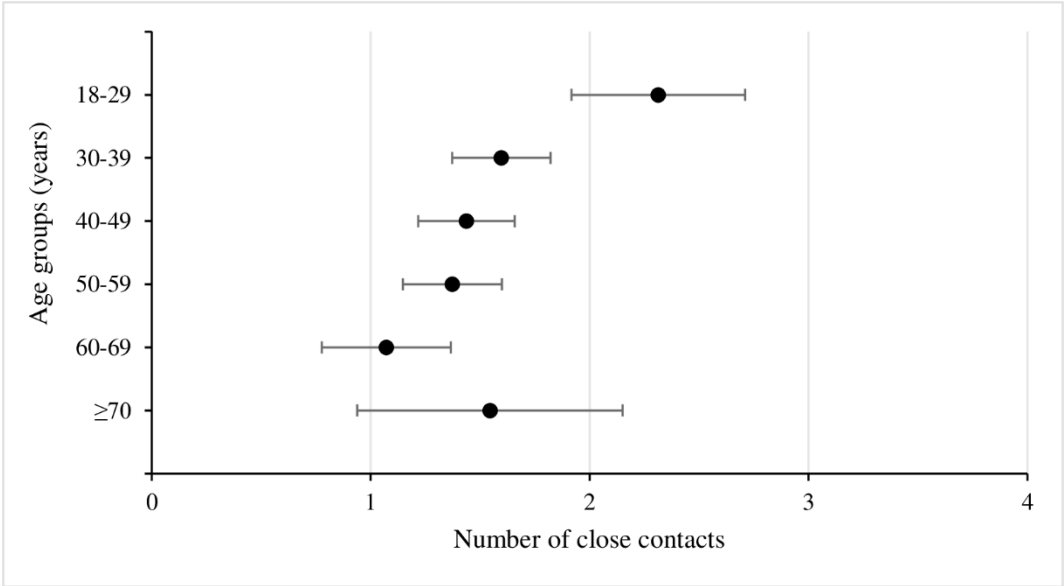

Note: (A) Close contact means coming within six feet of a non-household member; (B) Yesterday refers to the day before taking the survey; (C) Predicted number of contacts and 95 percent confidence intervals were calculated at mean values of other covariates based on Model 3 of S1 Table.
